# Supplementary material for: Characterizing Tetraploid Populations of Actinidia chinensis for Kiwifruit Genetic Improvement
Source: MDPI journal article supplement (doi:10.3390/plants11091154), 2022-04-24
Supplement: s1 [file s1]

# Characterizing tetraploid populations of *Actinidia chinensis* for kiwifruit genetic improvement

Zhi Wang <sup>1,2</sup>, Guangming Hu <sup>2,3</sup>, Zuozhou Li <sup>2</sup>, Caihong Zhong <sup>2,\*</sup> and Xiaohong Yao <sup>2,\*</sup>

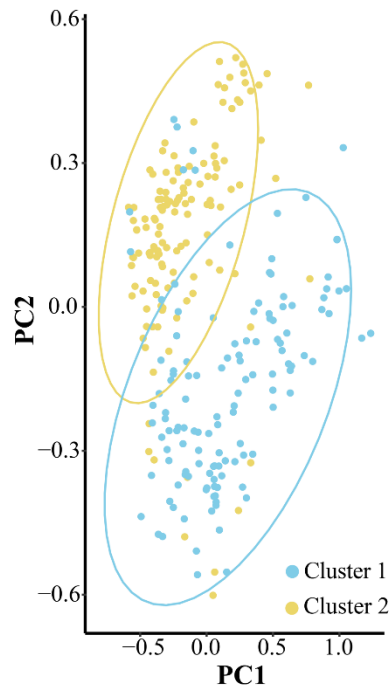

**Figure S1.** Principal coordinate analysis (PCoA) of *A. chinensis* based on 40 SSR markers.

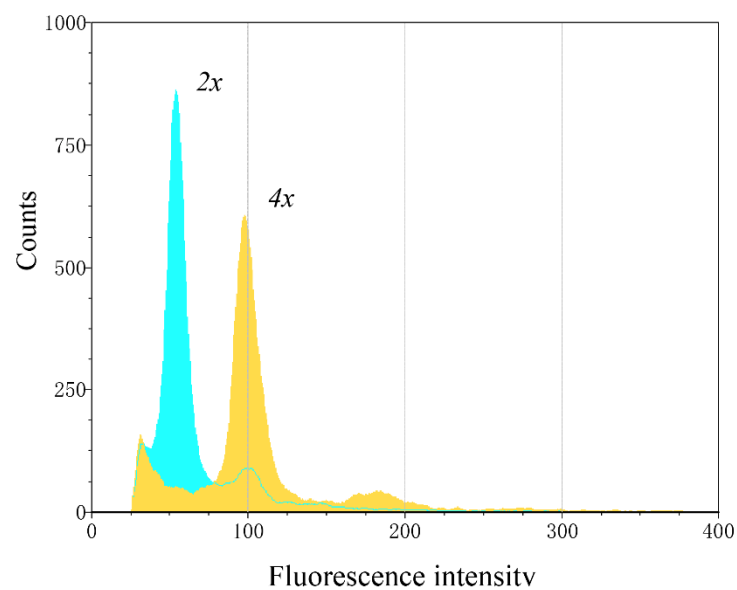

**Figure S2.** Schematic diagram of flow cytometric histogram of DAPI-stained nuclei of tetraploid *A. chinensis* (4x) analyzed simultaneously with the internal standard *Actinidia chinensis* cv. 'Hongyang' (2x).
